# Supplementary material for: Repression of the Glucocorticoid Receptor Increases Hypoxic-Ischemic Brain Injury in the Male Neonatal Rat
Source: PubMed Central journal article supplement (PMC6678481; doi:10.3390/ijms20143493), 2019-07-16
Supplement: ijms-20-03493-s001.pdf [file ijms-20-03493-s001.pdf]

**Table S1**  
Effect of repression of the GR on gait parameters during the CatWalk test 5, 6, and 7 weeks after hypoxic-ischemic injury

| Parameter                     | Paw   | 5 Weeks         |                    |                   | 6 Weeks         |                    |                   | 7 Weeks          |                    |                   |
|-------------------------------|-------|-----------------|--------------------|-------------------|-----------------|--------------------|-------------------|------------------|--------------------|-------------------|
|                               |       | Sham            | HIE + Neg. Control | HIE + siRNA GR    | Sham            | HIE + Neg. Control | HIE + siRNA GR    | Sham             | HIE + Neg. Control | HIE + siRNA GR    |
| Max Intensity                 | RF    | 131.7 ± 35.32   | 119.4 ± 44.94      | 138.3 ± 36.56     | 119.4 ± 34.64   | 114.4 ± 30.19      | 124.5 ± 33.47     | 152.8 ± 25.11    | 154.7 ± 25.03      | 165.5 ± 23.95     |
|                               | LF    | 132.5 ± 37.61   | 115.0 ± 43.22      | 141.5 ± 36.55     | 110.9 ± 34.71   | 122.3 ± 30.07      | 124.6 ± 34.69     | 159.1 ± 26.30    | 158.2 ± 27.54      | 172.2 ± 13.05     |
|                               | RH    | 126.0 ± 46.45   | 121.4 ± 52.28      | 132.0 ± 54.22     | 98.3 ± 36.82    | 94.42 ± 23.35      | 105.5 ± 33.34     | 126.9 ± 31.70    | 144.2 ± 31.30      | 147.5 ± 22.44     |
|                               | LH    | 131.0 ± 46.12   | 121.9 ± 57.26      | 138.3 ± 52.22     | 88.3 ± 31.81    | 100.2 ± 22.91      | 104.5 ± 36.14     | 125.6 ± 34.87    | 143.8 ± 33.26      | 148.6 ± 24.62     |
| Max Area (cm <sup>2</sup> )   | RF    | 0.7854 ± 0.3958 | 0.7064 ± 0.4752    | 0.8710 ± 0.3620   | 0.6514 ± 0.3012 | 0.6327 ± 0.2840    | 0.7812 ± 0.3360   | 1.0481 ± 0.3237  | 1.0401 ± 0.2787    | 1.1851 ± 0.2755   |
|                               | LF    | 0.8152 ± 0.3614 | 0.7018 ± 0.4506    | 0.9309 ± 0.3887   | 0.6214 ± 0.2994 | 0.6949 ± 0.2502    | 0.7719 ± 0.2847   | 1.1319 ± 0.3403  | 1.1670 ± 0.2864    | 1.3014 ± 0.2465   |
|                               | RH    | 0.5860 ± 0.3602 | 0.6099 ± 0.4582    | 0.6973 ± 0.4343   | 0.3836 ± 0.2065 | 0.4016 ± 0.1866    | 0.5127 ± 0.2553   | 0.7187 ± 0.2630  | 0.8157 ± 0.2963    | 0.9254 ± 0.2081   |
|                               | LH    | 0.6170 ± 0.3868 | 0.6340 ± 0.4884    | 0.7637 ± 0.4456   | 0.3594 ± 0.2221 | 0.4495 ± 0.2218    | 0.5326 ± 0.2862   | 0.7069 ± 0.2862  | 0.8866 ± 0.3313    | 0.8979 ± 0.1768   |
| Print Area (cm <sup>2</sup> ) | RF    | 0.9471 ± 0.4726 | 0.8510 ± 0.5610    | 1.0353 ± 0.4259   | 0.7571 ± 0.3392 | 0.7463 ± 0.3221    | 0.9151 ± 0.3631   | 1.2233 ± 0.3532  | 1.2348 ± 0.2900    | 1.3736 ± 0.2905   |
|                               | LF    | 0.9841 ± 0.4336 | 0.8463 ± 0.5440    | 1.1010 ± 0.4360   | 0.7340 ± 0.3244 | 0.8259 ± 0.2838    | 0.9088 ± 0.3248   | 1.3356 ± 0.4392  | 1.3894 ± 0.3448    | 1.5510 ± 0.3647   |
|                               | RH    | 0.7791 ± 0.5028 | 0.8155 ± 0.6320    | 0.9497 ± 0.5822   | 0.5303 ± 0.2978 | 0.5770 ± 0.2970    | 0.7233 ± 0.3529   | 0.9853 ± 0.3550  | 1.1516 ± 0.3813    | 1.2800 ± 0.2716   |
|                               | LH    | 0.8258 ± 0.5488 | 0.8340 ± 0.6462    | 1.0061 ± 0.5872   | 0.5118 ± 0.3293 | 0.6338 ± 0.3004    | 0.7382 ± 0.3950   | 0.9690 ± 0.3886  | 1.2527 ± 0.4205    | 1.2528 ± 0.2453   |
| Print Width (cm)              | RF    | 1.3072 ± 0.3541 | 1.1918 ± 0.4525    | 1.3826 ± 0.2924   | 1.2774 ± 0.3811 | 1.2536 ± 0.3541    | 1.3882 ± 0.3568   | 1.7961 ± 0.2447  | 1.7384 ± 0.1590    | 1.8336 ± 0.1729   |
|                               | LF    | 1.3160 ± 0.3697 | 1.1684 ± 0.4531    | 1.4169 ± 0.3222   | 1.2546 ± 0.3698 | 1.2995 ± 0.3294    | 1.4051 ± 0.3666   | 1.8323 ± 0.1574  | 1.8121 ± 0.1354    | 1.8499 ± 0.1269   |
|                               | RH    | 1.2373 ± 0.4344 | 1.2405 ± 0.4909    | 1.3374 ± 0.4075   | 1.1606 ± 0.4699 | 1.2169 ± 0.4010    | 1.3773 ± 0.3975   | 1.6508 ± 0.2319  | 1.6752 ± 0.2206    | 1.7462 ± 0.1701   |
|                               | LH    | 0.8258 ± 0.5488 | 0.8340 ± 0.6462    | 1.0061 ± 0.5872   | 0.5118 ± 0.3293 | 0.6338 ± 0.3004    | 0.7382 ± 0.3950   | 0.9690 ± 0.3886  | 1.2527 ± 0.4205    | 1.2528 ± 0.2453   |
| Print Length (cm)             | RF    | 1.3072 ± 0.3541 | 1.1918 ± 0.4525    | 1.3826 ± 0.2924   | 1.2774 ± 0.3811 | 1.2536 ± 0.3541    | 1.3882 ± 0.3568   | 1.7961 ± 0.2447  | 1.7384 ± 0.1590    | 1.8336 ± 0.1729   |
|                               | LF    | 1.7350 ± 0.3022 | 1.4802 ± 0.4897    | 1.8320 ± 0.2670   | 1.6676 ± 0.3762 | 1.7577 ± 0.4293    | 1.8350 ± 0.3688   | 2.2746 ± 0.5595  | 2.3016 ± 0.4267    | 2.4043 ± 0.5717   |
|                               | RH    | 1.2373 ± 0.4344 | 1.2405 ± 0.4909    | 1.3374 ± 0.4075   | 1.1606 ± 0.4699 | 1.2169 ± 0.4010    | 1.3773 ± 0.3975   | 1.6508 ± 0.2319  | 1.6752 ± 0.2206    | 1.7462 ± 0.1701   |
|                               | LH    | 1.3663 ± 0.5597 | 1.3192 ± 0.5764    | 1.5019 ± 0.4860   | 1.2006 ± 0.5685 | 1.4311 ± 0.4394    | 1.4948 ± 0.5597   | 1.7518 ± 0.3629  | 2.0599 ± 0.3883    | 2.0318 ± 0.2290   |
| Stride Length (cm)            | RF    | 12.39 ± 0.9811  | 11.96 ± 1.3442     | 11.70 ± 1.6773    | 14.36 ± 1.3836  | 13.48 ± 1.9654     | 13.52 ± 1.4637    | 15.01 ± 1.7778   | 14.67 ± 1.6709     | 14.49 ± 0.9688    |
|                               | LF    | 11.99 ± 1.2654  | 11.84 ± 1.3881     | 11.76 ± 1.4112    | 14.21 ± 1.5454  | 13.44 ± 1.9384     | 13.47 ± 1.3791    | 15.08 ± 1.8664   | 14.7 ± 1.3930      | 14.35 ± 0.9595    |
|                               | RH    | 11.98 ± 1.2782  | 11.55 ± 1.4830     | 11.71 ± 2.5334    | 13.70 ± 1.8413  | 12.9 ± 2.0038      | 12.78 ± 1.7880    | 15.01 ± 1.7778   | 14.87 ± 1.5619     | 14.23 ± 1.4000    |
|                               | LH    | 11.94 ± 1.1227  | 11.7 ± 1.0637      | 11.55 ± 1.7125    | 12.87 ± 2.1434  | 12.97 ± 1.4998     | 12.87 ± 1.9861    | 14.92 ± 1.7537   | 14.86 ± 1.4147     | 14.24 ± 0.9531    |
| Stand (s)                     | RF #  | 0.1694 ± 0.0364 | 0.1764 ± 0.0487    | 0.1959 ± 0.0460   | 0.1602 ± 0.0361 | 0.1642 ± 0.0282    | 0.1945 ± 0.0340   | 0.1873 ± 0.0404  | 0.2011 ± 0.0330    | 0.2252 ± 0.0304   |
|                               | LF ## | 0.1646 ± 0.0334 | 0.1728 ± 0.0528    | 0.2040 ± 0.0531 * | 0.1523 ± 0.0316 | 0.1709 ± 0.0327    | 0.1918 ± 0.0379 * | 0.1830 ± 0.0358  | 0.2098 ± 0.0344    | 0.2266 ± 0.0248 * |
|                               | RH #  | 0.1644 ± 0.0536 | 0.1924 ± 0.0619    | 0.2102 ± 0.0699   | 0.1516 ± 0.0507 | 0.1687 ± 0.0427    | 0.1848 ± 0.0438   | 0.1871 ± 0.0487  | 0.2178 ± 0.0458    | 0.2400 ± 0.0342 * |
|                               | LH #  | 0.1664 ± 0.0474 | 0.1863 ± 0.0487    | 0.2098 ± 0.0614   | 0.1427 ± 0.0488 | 0.1777 ± 0.0372    | 0.1884 ± 0.0416   | 0.1925 ± 0.0490  | 0.2164 ± 0.0434    | 0.2339 ± 0.0366   |
| Swing (s)                     | RF    | 0.1418 ± 0.0189 | 0.1563 ± 0.0301    | 0.1565 ± 0.0430   | 0.1447 ± 0.0124 | 0.1508 ± 0.0333    | 0.1498 ± 0.0219   | 0.1351 ± 0.0141  | 0.1465 ± 0.0152    | 0.1537 ± 0.0208   |
|                               | LF    | 0.1382 ± 0.0171 | 0.1527 ± 0.0254    | 0.1522 ± 0.0420   | 0.1464 ± 0.0251 | 0.1475 ± 0.0275    | 0.1518 ± 0.0262   | 0.1409 ± 0.0170  | 0.1415 ± 0.0119    | 0.1418 ± 0.0175   |
|                               | RH    | 0.1342 ± 0.0322 | 0.1302 ± 0.0238    | 0.1407 ± 0.0470   | 0.1356 ± 0.0316 | 0.1288 ± 0.0217    | 0.1379 ± 0.0290   | 0.1270 ± 0.0140  | 0.1234 ± 0.0107    | 0.1280 ± 0.0141   |
|                               | LH    | 0.1295 ± 0.0223 | 0.1365 ± 0.0257    | 0.1376 ± 0.0211   | 0.1299 ± 0.0268 | 0.1261 ± 0.0181    | 0.1362 ± 0.0220   | 0.1231 ± 0.0089  | 0.1249 ± 0.0110    | 0.1275 ± 0.0116   |
| Step Cycle (s)                | RF #  | 0.3132 ± 0.0422 | 0.3364 ± 0.0495    | 0.3546 ± 0.0684   | 0.3083 ± 0.0355 | 0.3169 ± 0.0366    | 0.3450 ± 0.0476   | 0.3290 ± 0.0436  | 0.3528 ± 0.0409    | 0.3808 ± 0.0327 * |
|                               | LF ## | 0.3033 ± 0.0412 | 0.3305 ± 0.0547    | 0.3593 ± 0.0821 * | 0.3022 ± 0.0392 | 0.3213 ± 0.0347    | 0.3483 ± 0.0491   | 0.3282 ± 0.0438  | 0.3607 ± 0.0388    | 0.3752 ± 0.0381   |
|                               | RH #  | 0.2989 ± 0.0408 | 0.3220 ± 0.0597    | 0.3540 ± 0.0724 * | 0.2842 ± 0.0398 | 0.2968 ± 0.0543    | 0.3238 ± 0.0336   | 0.3152 ± 0.0508  | 0.3285 ± 0.0301    | 0.3678 ± 0.0377 * |
|                               | LH ## | 0.2950 ± 0.0406 | 0.3205 ± 0.0477    | 0.3484 ± 0.0716 * | 0.2716 ± 0.0489 | 0.3039 ± 0.0490    | 0.3267 ± 0.0482 * | 0.3158 ± 0.0504  | 0.3464 ± 0.0515    | 0.3607 ± 0.0394   |
| Duty Cycle                    | RF    | 53.77 ± 5.3495  | 52.15 ± 7.7555     | 55.82 ± 5.5822    | 52.09 ± 6.9684  | 52.45 ± 6.2253     | 55.5 ± 6.4299     | 57.93 ± 5.0189   | 56.92 ± 4.2817     | 59.04 ± 4.1547    |
|                               | LF #  | 53.32 ± 4.4703  | 52.16 ± 7.9826     | 57.41 ± 5.2408    | 50.67 ± 6.2752  | 53.9 ± 5.9094      | 55.84 ± 5.3103    | 56.24 ± 4.1276   | 59.12 ± 4.2703     | 60.68 ± 2.6772    |
|                               | RH    | 53.79 ± 11.8246 | 57.21 ± 8.0929     | 58.38 ± 10.3907   | 50.85 ± 12.3716 | 55.06 ± 4.9810     | 56.73 ± 7.6482    | 58.18 ± 6.1064   | 60.92 ± 4.1938     | 63.21 ± 3.0587    |
|                               | LH    | 54.5 ± 9.7923   | 55.2 ± 7.9373      | 58.2 ± 8.3837     | 51.25 ± 10.0978 | 56.5 ± 5.2316      | 56.12 ± 7.8403    | 59.18 ± 6.0951   | 61.2 ± 5.0433      | 63.09 ± 2.6653    |
| Swing Speed (cm/s)            | RF    | 96.88 ± 21.7533 | 85.97 ± 22.1969    | 84.08 ± 19.1661   | 103.1 ± 15.7509 | 96.65 ± 26.4800    | 94.96 ± 16.2947   | 117.5 ± 24.1208  | 107.45 ± 13.6460   | 100.5 ± 12.7093   |
|                               | LF    | 94.85 ± 15.3659 | 83.96 ± 18.9664    | 87.82 ± 18.4589   | 108.0 ± 23.8727 | 98.02 ± 23.3002    | 96.48 ± 15.6744   | 118.01 ± 19.7833 | 119.3 ± 41.4592    | 110.3 ± 26.2080   |
|                               | RH    | 95.67 ± 22.0123 | 92.75 ± 24.4179    | 90.74 ± 21.4989   | 105.1 ± 18.9117 | 103.0 ± 25.7258    | 102.3 ± 20.6580   | 120.2 ± 21.1235  | 122.2 ± 15.9922    | 113.8 ± 14.2369   |
|                               | LH    | 95.43 ± 16.7071 | 90.63 ± 22.3561    | 88.65 ± 18.9895   | 99.55 ± 26.7360 | 106.27 ± 21.8013   | 100.2 ± 26.0638   | 122.9 ± 16.4659  | 120.9 ± 15.7921    | 115.7 ± 10.5835   |

Table values are Mean ± SD, \* Significant difference when compared to Sham, # Significant group difference in a 2-way ANOVA (Sham vs. Neg. Control vs. siRNA GR).
